# Supplementary material
Source: ML conference proceedings conference paper supplement (https://proceedings.mlr.press/v89/amid19a.html)
Supplement: Supplementary file [file amid19a-supp.pdf]

## A Verification of Iterative Algorithms for Computing $G_t$

In this section, we verify that the iterative algorithm for computing  $G_t$  is going to converge in the binary case. The proof for the multiclass case follows immediately as a simple extension. We only need to verify that  $\tilde{a}^{(k)}$  converges to the corresponding  $\tilde{a}$  of  $a$  such that the value of  $G_t$  normalizes the sum.

First of all, given  $a$ , since  $t > 1$  and  $Z(\tilde{a}) > 1$ , it is clear that  $0 < \tilde{a} < a$ . On the domain of  $0 < u < a$ , it is easy to verify that  $Z(u)^{1-t}a - u$  is a monotonically decreasing function and it crosses at 0 only at  $\tilde{a}$ . Therefore, when  $\tilde{a}^{(k)} > \tilde{a}$ ,  $\tilde{a}^{(k+1)} < \tilde{a}^{(k)}$ ; when  $\tilde{a}^{(k)} < \tilde{a}$ ,  $\tilde{a}^{(k+1)} > \tilde{a}^{(k)}$ .

We then prove that  $\tilde{a}^{(k)}$  is a monotonically decreasing sequence. We prove this by mathematical induction. Since  $\tilde{a}^{(0)} = \hat{a}$ ,  $\tilde{a}^{(1)} < a = \tilde{a}^{(0)}$ . Next assume that in the  $k$ -th iteration,  $\tilde{a}^{(k)} < \tilde{a}^{(k-1)}$ . Since  $Z(\tilde{a}^{(k)}) > Z(\tilde{a}^{(k-1)})$ , we have  $\tilde{a}^{(k+1)} < \tilde{a}^{(k)}$ . Therefore, it follows that  $\tilde{a}^{(k)}$  is monotonically decreasing and it is lower bounded by  $\tilde{a}$ . Furthermore,  $\lim_{k \rightarrow +\infty} \tilde{a}^{(k)}$  exists.

Finally,

$$\begin{aligned} \lim_{k \rightarrow +\infty} \tilde{a}^{(k)} &= \lim_{k \rightarrow +\infty} \tilde{a}^{(k+1)} \\ &= \lim_{k \rightarrow +\infty} Z(\tilde{a}^{(k)})^{1-t} a \\ &= Z\left(\lim_{k \rightarrow +\infty} \tilde{a}^{(k)}\right)^{1-t} a, \end{aligned} \quad (\text{A.1})$$

where (A.1) holds because  $Z(u)^{1-t}$  is continuous in  $u$ . Therefore, it follows that  $\lim_{k \rightarrow +\infty} \tilde{a}^{(k)} = \tilde{a}$ .

For the binary case when  $t = 2$ , note that

$$\exp_t(x) = (1-x)^{-1} \quad \text{and} \quad \log_t(x) = 1-x^{-1}.$$

The value  $G_t(a)$  needs to satisfy

$$\begin{aligned} 1 &= \exp_t\left(\frac{a}{2} - G_t(a)\right) + \exp_t\left(-\frac{a}{2} - G_t(a)\right) \\ &= \frac{1}{1 + a/2 + G_t(a)} + \frac{1}{1 - a/2 + G_t(a)} \\ &= \frac{2(1 + G_t(a))}{(1 + G_t(a))^2 - a^2/4}, \end{aligned}$$

which yields

$$(1 + G_t(a))^2 - \frac{a^2}{4} = 2(1 + G_t(a)).$$

By cancelling the terms from both sides, we have

$$G_t(a)^2 = \frac{a^2}{4} + 1.$$

Since  $G_t(a) \geq 0$ , we have  $G_t(a) = \sqrt{a^2/4 + 1}$ .

## B Proof of Remark 1

For the surrogate loss

$$\xi_{t_1}^{t_2}(a) = -\log_{t_1} \exp_{t_2}(a/2 - G_{t_2}(a)),$$

we have

$$\begin{aligned} \frac{\partial \xi_{t_1}^{t_2}(a)}{\partial a} &= -\hat{p}_{t_2}(a)^{t_2-t_1} \left( \frac{1}{2} - \partial G_{t_2}(a) \right), \\ \frac{\partial^2 \xi_{t_1}^{t_2}(a)}{\partial a^2} &= \hat{p}_{t_2}(a)^{t_2-t_1} \times \\ &\quad \left[ \partial^2 G_{t_2}(a) - (t_2 - t_1) \hat{p}_{t_2}(a)^{t_2-1} \left( \frac{1}{2} - G_{t_2}(a) \right)^2 \right], \end{aligned} \quad (\text{B.1})$$

where we define  $\hat{p}_{t_2}(a) := \exp_{t_2}(a/2 - G_{t_2}(a))$  and  $\partial G_{t_2}(a)$  and  $\partial^2 G_{t_2}(a)$  are given as follows.

$$\partial G_{t_2}(a) = \frac{1 \sum_c c \exp_{t_2}\left(\frac{c}{2}a - G_{t_2}(a)\right)^{t_2}}{2 \sum_c \exp_{t_2}\left(\frac{c}{2}a - G_{t_2}(a)\right)^{t_2}}, \quad (\text{B.2})$$

$$\partial^2 G_{t_2}(a) = \frac{t_2 \sum_c \exp_{t_2}\left(\frac{c}{2}a - G_{t_2}(a)\right)^{2t_2-1} \left[\frac{c}{2} - \partial G_{t_2}(a)\right]^2}{\sum_c \exp_{t_2}\left(\frac{c}{2}a - G_{t_2}(a)\right)^{t_2}}. \quad (\text{B.3})$$

For  $t_2 = t_1 \geq 1$ , we have

$$\frac{\partial^2 \xi_{t_1}^{t_2}(a)}{\partial a^2} = \partial^2 G_{t_2}(a) \geq 0,$$

which can be verified from (B.3). Moreover, for  $t_1 \geq 1$  and  $t_1 \geq t_2$ , we have

$$\begin{aligned} \frac{\partial^2 \xi_{t_1}^{t_2}(a)}{\partial a^2} &= \frac{1}{\hat{p}_{t_2}(a)^{t_1-t_2}} \times \\ &\quad \left[ \partial^2 G_{t_2}(a) + (t_1 - t_2) \hat{p}_{t_2}(a)^{t_2-1} \left( \frac{1}{2} - G_{t_2}(a) \right)^2 \right] \\ &\geq \partial^2 G_{t_2}(a) + (t_1 - t_2) \hat{p}_{t_2}(a)^{t_2-1} \left( \frac{1}{2} - G_{t_2}(a) \right)^2 \\ &\geq \partial^2 G_{t_2}(a) \geq 0. \end{aligned} \quad (\text{B.4})$$

Thus, the loss is convex, similar to the latter case.

Now, consider the case  $t_2 \geq t_1$ . Suppose  $\hat{p}_{t_2}(-a) = (1 - \hat{p}_{t_2}(a)) = \lambda \hat{p}_{t_2}(a)$  for some  $\lambda \geq 0$ . Substituting for  $\hat{p}_{t_2}(-a)$  in (B.2) and (B.3), we can write (B.1) as

$$\begin{aligned} \frac{\partial^2 \xi_{t_1}^{t_2}(a)}{\partial a^2} &= \hat{p}_{t_2}(a)^{t_2-1} \frac{1}{(1 + \lambda^{t_2})^2} \\ &\quad \times \left[ t_2 \left( \frac{1 + \frac{1}{\lambda}}{1 + \lambda^{t_2}} \right) - (t_2 - t_1) \right]. \end{aligned}$$

For sufficiently small (respectively, large) value of  $\lambda$ , we have  $\frac{\partial^2 \xi_{t_1}^{t_2}(a)}{\partial a^2} > 0$  (respectively,  $\frac{\partial^2 \xi_{t_1}^{t_2}(a)}{\partial a^2} < 0$ ). The

inflection point happens when  $t_2(1 + \frac{1}{\lambda}) = (t_2 - t_1)(1 + \lambda^{t_2})$ , i.e.  $\frac{\partial^2 \xi_{t_1}^{t_2}(a)}{\partial a^2} = 0$ .

Finally, we show the case  $t_1 < 1$ . We only need to consider the case  $t_2 \leq t_1 < 1$ . Note that for the binary case,

$$\exp_{t_2}(a/2 - G_{t_2}(a)) + \exp_{t_2}(-a/2 - G_{t_2}(a)) = 1. \quad (\text{B.5})$$

Using the definition of  $\exp_{t_2}$ , we can write (B.5) as

$$\begin{aligned} & [1 + (1 - t_2)(a/2 - G_{t_2}(a))]_{+}^{1/(1-t_2)} \\ & + [1 + (1 - t_2)(-a/2 - G_{t_2}(a))]_{+}^{1/(1-t_2)} = 1. \end{aligned} \quad (\text{B.6})$$

For  $a = 0$ , (B.6) yields

$$[1 + (1 - t_2)(-G_{t_2}(0))]_{+}^{1/(1-t_2)} = \frac{1}{2}.$$

From  $t_2 < 1$ , we have  $(1 - t_2) > 0$  and therefore,  $G_{t_2}(0) > 0$ . From convexity and symmetry ( $G_{t_2}(a) = G_{t_2}(-a)$ ) conditions, we conclude  $G_{t_2}(a) \geq G_{t_2}(0) \geq 0, \forall a$ . Consequently, for values of  $a \leq -\frac{1}{(1-t_2)}$ ,  $G_{t_2}(a) = -\frac{a}{2}$  satisfies (B.5). This implies that for  $a \leq -\frac{1}{(1-t_2)}$ , we have  $\hat{p}_{t_2}(a) = 0$  and thus,  $\xi_{t_1}^{t_2}(a) = -\log_{t_1}(0) = -\frac{1}{1-t_1}$  is a constant. From (B.4), we conclude that the loss is convex for  $a > -\frac{1}{(1-t_2)}$  and is a constant for  $a \leq -\frac{1}{(1-t_2)}$ . Thus, it is quasi-convex.
